# Supplementary material
Source: PubMed Central journal article supplement (PMC2728996)
Supplement: 0901219106_0901219106SI.pdf [file 0901219106_0901219106SI.pdf]

# Supporting Information

de Pontual et al. 10.1073/pnas.0901219106

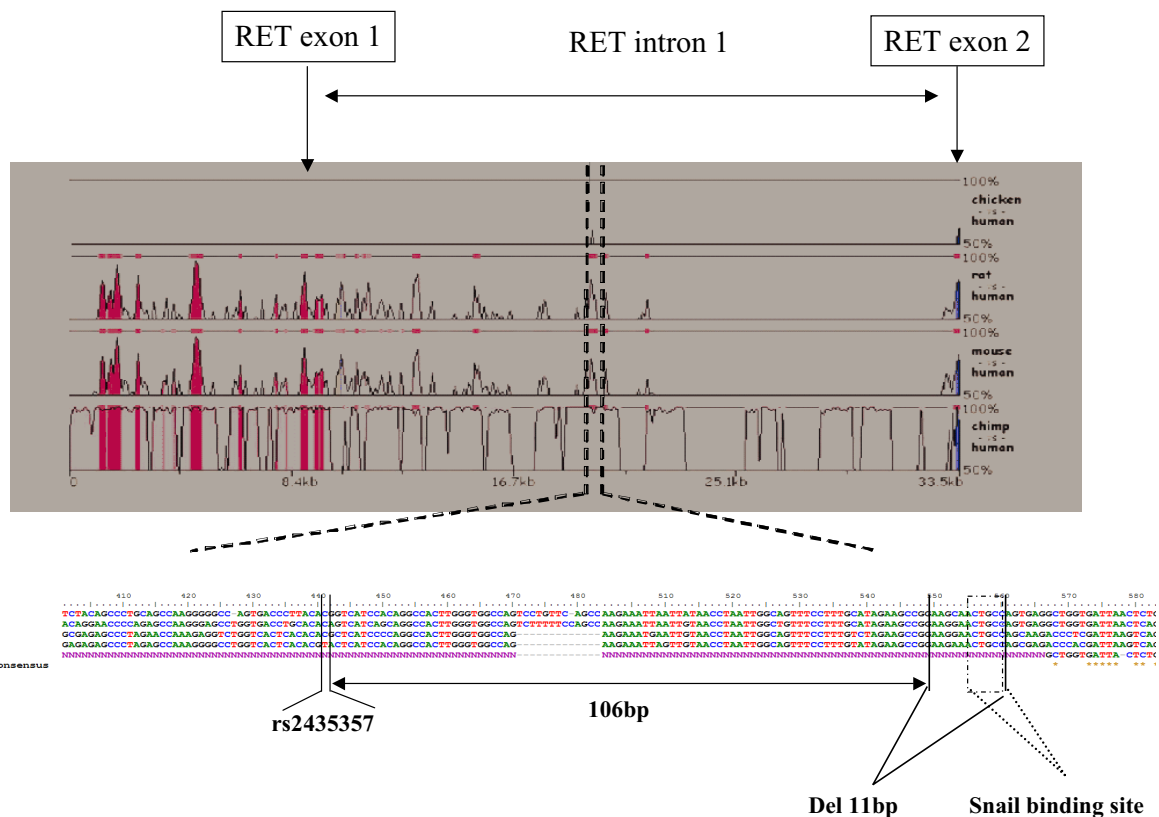

**Fig. S1.** Considering the rs2435357 SNP lying in intron one of the *RET* gene, the T allele is the hypomorphic Hirschsprung disease (HSCR) predisposing *RET* allele, and the C is the WT type allele. del, the (AAGCACTGCC) 11-bp deletion identified in intron 1 of *RET* gene.



**Table S1. Ciliary proteins expressed in cultured human NCC**

| Protein | Cellular localization     |
|---------|---------------------------|
| BBS1    | Basal body/centrosome     |
| BBS10   | Basal body/centrosome     |
| BBS2    | Basal body/centrosome     |
| BBS3    | Basal body/centrosome     |
| BBS4    | Basal body/centrosome     |
| BBS5    | Basal body/centrosome     |
| BBS6    | Basal body/centrosome     |
| BBS7    | Basal body/centrosome     |
| BBS8    | Basal body/centrosome     |
| BBS9    | Basal body/centrosome     |
| CCDC28B | Basal body/centrosome     |
| CETN3   | Basal body/centrosome     |
| LRRC1   | Basal body/centrosome     |
| MKS1    | Basal body/centrosome     |
| MKS3    | Basal body/centrosome     |
| OFD1    | Basal body/centrosome     |
| TUBE1   | Basal body/centrosome     |
| TUBG1   | Basal body/centrosome     |
| TUBG2   | Basal body/centrosome     |
| PPP1CC  | Central pair              |
| SPAG6   | Central pair              |
| CALM3   | Ciliary axoneme           |
| CCDC146 | Ciliary axoneme           |
| Cys1    | Ciliary axoneme           |
| EFHC1   | Ciliary axoneme           |
| GLI2    | Ciliary axoneme           |
| HSPA1A  | Ciliary axoneme           |
| HYDIN   | Ciliary axoneme           |
| PPP2R1A | Ciliary axoneme           |
| RIBC1   | Ciliary axoneme           |
| SSNA1   | Ciliary axoneme           |
| TEKT2   | Ciliary axoneme           |
| TEKT3   | Ciliary axoneme           |
| HTR1B   | Ciliary membrane          |
| HTR2C   | Ciliary membrane          |
| PDGFRA  | Ciliary membrane          |
| PKD1    | Ciliary membrane          |
| PKD2    | Ciliary membrane          |
| PKHD1   | Ciliary membrane          |
| SMO     | Ciliary membrane          |
| CROCC   | Ciliary rootlet           |
| GAS8    | Dynein regulatory complex |
| ACTG1   | Inner dynein arm          |
| DNAH7   | Inner dynein arm          |
| DNALI1  | Inner dynein arm          |
| DYNLT1  | Inner dynein arm          |
| WDR63   | Inner dynein arm          |
| WDR78   | Inner dynein arm          |
| DNCH2   | Intraflagellar transport  |
| IFT122  | Intraflagellar transport  |
| IFT140  | Intraflagellar transport  |
| IFT172  | Intraflagellar transport  |
| IFT20   | Intraflagellar transport  |
| IFT52   | Intraflagellar transport  |
| IFT57   | Intraflagellar transport  |
| IFT72   | Intraflagellar transport  |
| IFT74   | Intraflagellar transport  |
| IFT80   | Intraflagellar transport  |
| IFT81   | Intraflagellar transport  |
| IFT88   | Intraflagellar transport  |
| KIF3A   | Intraflagellar transport  |
| KIF3B   | Intraflagellar transport  |
| KIFAP3  | Intraflagellar transport  |
| AK5     | Outer dynein arm          |

| Protein  | Cellular localization |
|----------|-----------------------|
| CCDC63   | Outer dynein arm      |
| DNAH5    | Outer dynein arm      |
| DNAH9    | Outer dynein arm      |
| DNAI1    | Outer dynein arm      |
| DNAI2    | Outer dynein arm      |
| DNAL1    | Outer dynein arm      |
| DYNLL2   | Outer dynein arm      |
| DYNLRB2  | Outer dynein arm      |
| TCTEX1D2 | Outer dynein arm      |
| DAAM1    | PCP pathway           |
| DVL1     | PCP pathway           |
| DVL2     | PCP pathway           |
| DVL3     | PCP pathway           |
| MAPK8    | PCP pathway           |
| ROCK1    | PCP pathway           |
| VANGL2   | PCP pathway           |
| RSHL3    | Radial spoke          |
| RSPH3    | Radial spoke          |
| TUBA1A   | Tubulin               |
| TUBB2C   | Tubulin               |
